# Supplementary material
Source: publisher figshare collection journal article supplement (https://sage.figshare.com/ndownloader/files/22659173)
Supplement: Supplementary file 1 [file 22659173]

**SUPPLEMENTARY FIGURE 1**

**Supplentary Figure 1.** Multimodal Imaging of case 3 at three different time points from October 2016 to April 2017. No change in CNV was noted on OCT-A, while subretinal fluid fluctuated during these phase. Arrows indicate subretinal fluid on OCT.
